# Supplementary material for: Metagenomics-Based Analysis of the Effect of Rice Straw Substitution for a Proportion of Whole-Plant Corn Silage on the Rumen Flora Structure and Carbohydrate-Active Enzymes (CAZymes)
Source: MDPI journal article supplement (doi:10.3390/fermentation9110954), 2023-11-07
Supplement: s1 [file s1]

**Table S1.** Composition and nutrient levels of experimental diets (DM basis)

|                         | Items                 | group |       |
|-------------------------|-----------------------|-------|-------|
|                         |                       | CS    | RS    |
| Diet composition        | Concentrates          | 13.84 | 13.84 |
|                         | Flaked corn           | 22.5  | 22.5  |
|                         | Beet pellets          | 2     | 2     |
|                         | Beer lees             | 1.53  | 1.53  |
|                         | Alfalfa silage        | 4.12  | 4.12  |
|                         | Alfalfa               | 10.32 | 10.32 |
|                         | Whole corn silage     | 45.06 | 30.06 |
|                         | Rice straw            |       | 15    |
|                         | NaHCO <sub>3</sub>    | 0.166 | 0.166 |
|                         | Additives             | 0.464 | 0.464 |
|                         | Total                 | 100   | 100   |
| Nutritional composition | CP (%)                | 11.69 | 10.97 |
|                         | NE <sub>L</sub> MJ/kg | 5.94  | 5.80  |
|                         | NDF (%)               | 30.74 | 33.48 |
|                         | ADF (%)               | 17.8  | 19.58 |

1) NE<sub>L</sub> was a calculated value, while the others were measured values.

**Table S2.** Nutritional composition of rice straw and whole corn silage (DM basis)

| Items             | NDF (%) | ADF (%) | CP (%) | NE <sub>L</sub> MJ/kg |
|-------------------|---------|---------|--------|-----------------------|
| Whole corn silage | 41.22   | 21.72   | 8.26   | 1.18                  |
| Rice straw        | 59.51   | 33.59   | 3.45   | 0.28                  |

1) NE<sub>L</sub> was a calculated value, while the others were measured values.
